# Supplementary material for: Coupled reactions by coupled enzymes: alcohol to lactone cascade with alcohol dehydrogenase–cyclohexanone monooxygenase fusions
Source: PubMed Central journal article supplement (PMC5624969; doi:10.1007/s00253-017-8501-4), 2017-09-15
Supplement: 253_2017_8501_MOESM1_ESM.pdf [file 253_2017_8501_MOESM1_ESM.pdf]

**“Coupled reactions by coupled enzymes: Alcohol to Lactone cascade with Alcohol Dehydrogenase – Cyclohexanone Monooxygenase Fusions” – Supplementary material**

Applied Microbiology and Biotechnology

Friso S. Aalbers and M.W. Fraaije

Laboratory of Biochemistry, Groningen Biomolecular Sciences and Biotechnology Institute, University of Groningen, Nijenborgh 4, 9747 AG Groningen, The Netherlands

E-mail: m.w.fraaije@rug.nl

**Table S1.** Oligonucleotide primers for fusion cloning. Nucleotide order is from 5' to 3'. Fusions were made with either an *adh* as first gene ('begin'), with the TmCHMO gene downstream, or as second gene ('end'), after the *TmCHMO* gene.

|                      |                                          |
|----------------------|------------------------------------------|
| begin_AdhA_NdeI_F    | GGAATTCCATATGAAGGTTGCCGTAATTACTGGGG      |
| begin_AdhA_XhoI_R    | CTGACTCGAGTACTCAGGTTTTTGATAAATTGAGCG     |
| end_AdhA_PvuII_F     | GCTTCAGCTGGTATGAAGGTTGCCGTAATTACTGGGG    |
| end_AdhA_ApaI_R      | GACAGGGCCCTTAATACTCAGGTTTTTGATAAATTGAGCG |
| begin_AdhMi_NdeI_F   | GGAATTCCATATGAAGCGTTTTGAGGGCAAGGTGG      |
| begin_AdhMi_XhoI_R   | CTGACTCGAGCCCTTCGCGGTATAACCACCATC        |
| end_AdhMi_HindIII_R  | CTCAAGCTTACTTCGCGGTATAACCACC             |
| end_AdhMi_PvuII_F    | GGAATTCCAGCTGGTATGAAGCGTTTTGAGGGCAAG     |
| begin_AdhT_NdeI_F    | GGAATTCCATATGAAAGGTTTCGCC                |
| begin_AdhT_XhoI_R    | CTGACTCGAGGCCAGAATAACAACACTGG            |
| end_AdhT_PvuII_F     | GCTTCAGCTGGTATGAAAGGTTTCGCCATG           |
| end_AdhT_HindIII_R   | CTCAAGCTTACGCCAGAATAACAACACTG            |
| begin_TmCHMO_NdeI_F  | GGAATTCCATATGAGCACCACCCAGACCC            |
| begin_TmCHMO_XhoI_R  | CTGACTCGAGGCCACCGCTTGCGCACGTTCCACC       |
| end_TmCHMO_PvuII_F   | GCTTCAGCTGGTATGAGCACCACCCAGACCC          |
| end_TmCHMO_HindIII_R | CTCAAGCTTACGCCACCGCTTGCGCACGTTCA         |

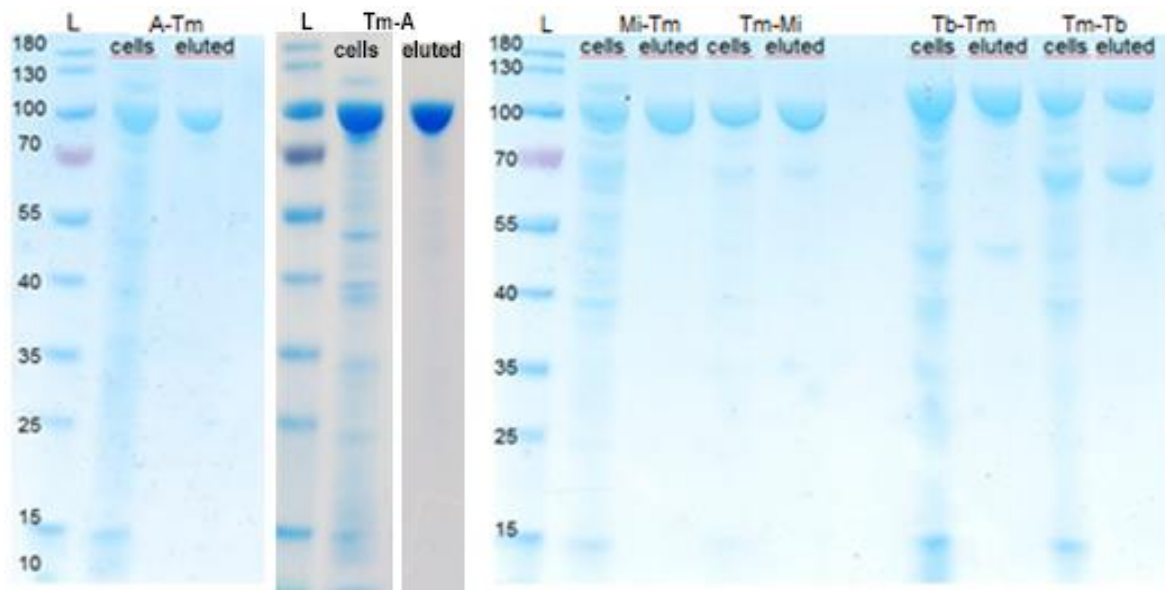

**Figure S1.** SDS-PAGE of the purification of 6 fusion constructs. Values of PageRuler sizes expressed in kDa. The 'eluted' fraction is the protein sample obtained after the elution with 500 mM imidazole.

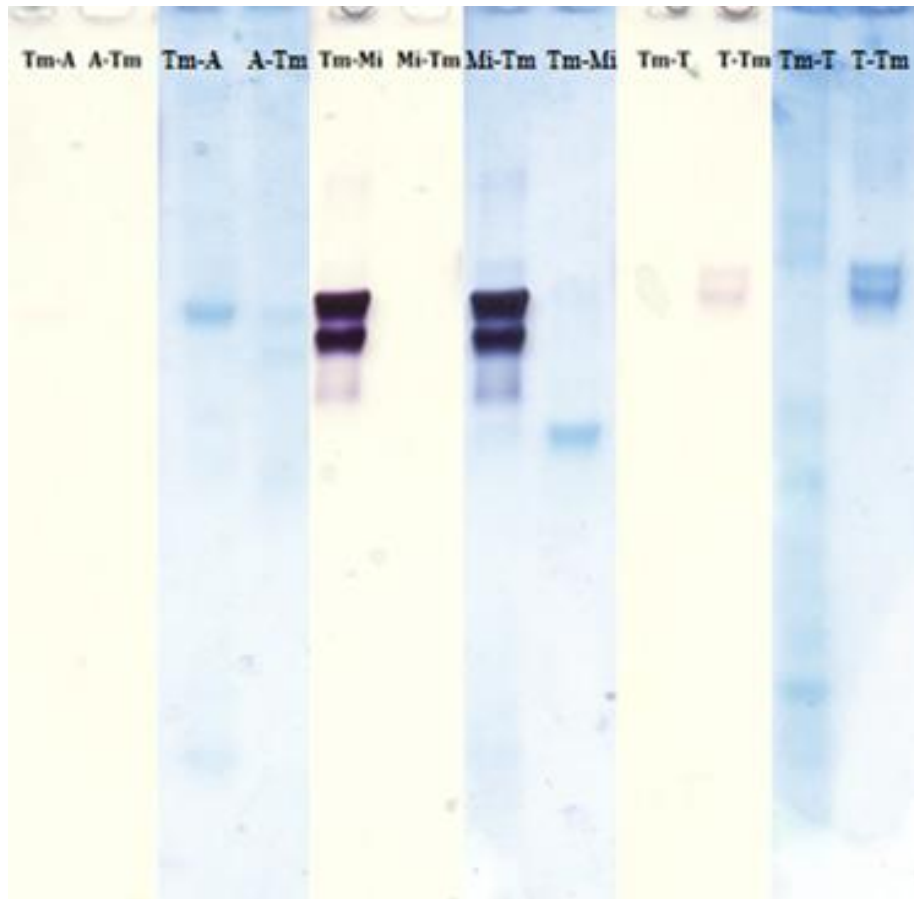

**Fig. S2** Blue native-PAGE, first stained with zymography (left tile of every fusion), and afterwards stained with Coomassie blue (right tile).

**Fig. S3** Gel filtration chromatograms of the fusion enzymes, with elution volumes on the X-axis (mL) and the relative absorption at 280 nm on the Y-axis. Elution volumes lower than 11 mL correspond to a  $kDa \geq 400$ , and volumes more than 13 mL correspond to molecular weights  $\leq 100$  kDa, based on calibration curve made from standards (BioRad). A: A-Tm (grey) and Tm-A (black). B: Mi-Tm (grey) and Tm-Mi (black). C: Tb-Tm (grey) and Tm-Tb (black).

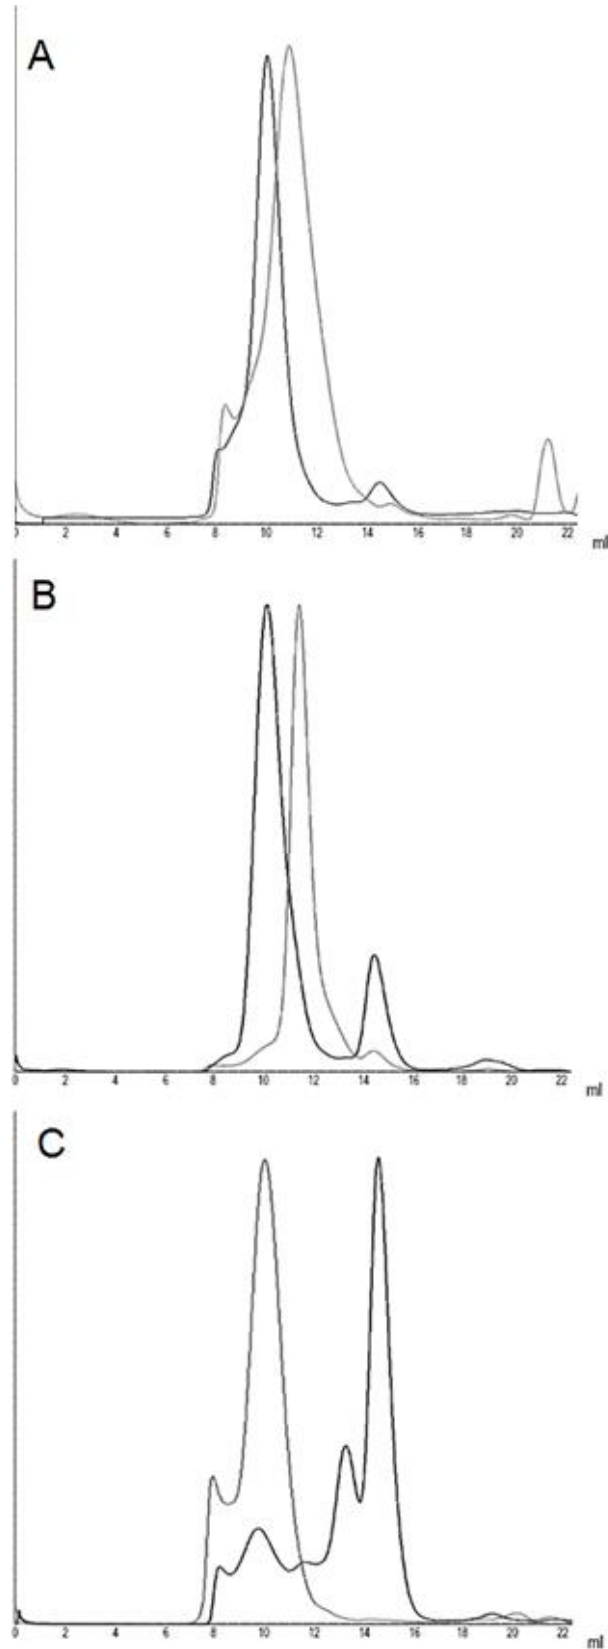

**Table S2.** Fusion enzyme data

| Enzyme | FAD ratio | Expression<br>(mg/L<br>culture) | Melting point<br>[a] (°C) | Melting point<br>[b] (°C) | Melting point<br>[c] (°C) |
|--------|-----------|---------------------------------|---------------------------|---------------------------|---------------------------|
| ADHA   | -         | -                               | -                         | 98.5                      | -                         |
| A-Tm   | 17.4      | 120                             | 48.0                      | 48.5                      | -                         |
| Tm-A   | -         | -                               | 48.5                      | 53.0                      | -                         |
| ADHMi  | -         | -                               | -                         | 69.0                      | -                         |
| Mi-Tm  | 15.9      | 180                             | 49.5                      | 50.0                      | 65.5                      |
| Tm-Mi  | 15.0      | 290                             | 48.8                      | 50.3                      | 65.0                      |
| TbADH  | -         | -                               | -                         | 93.0                      | -                         |
| Tb-Tm  | 16.2      | 320                             | 48.8                      | 51.5                      | 85.3                      |
| Tm-Tb  | 14.4      | 320                             | 49.0                      | 49.5                      | -                         |

FAD ratio ( $A_{280}/A_{441}$ ), expression, ThermoFluor® and ThermoFAD results. Melting point [a] is the ThermoFAD result, [b] is the ThermoFluor® value of the first peak, [c] is the ThermoFluor second peak.

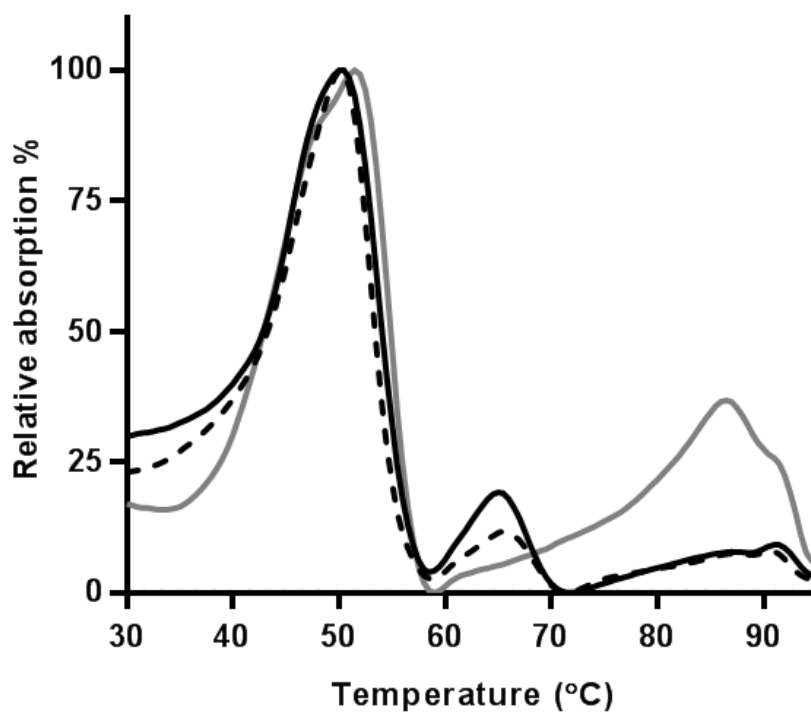

**Fig. S4** ThermoFluor® of the samples showing second peaks. Black line = Mi-Tm, dashed black line = Tm-Mi, grey line = Tb-Tm. The graphs represent the average of duplicate experiments.

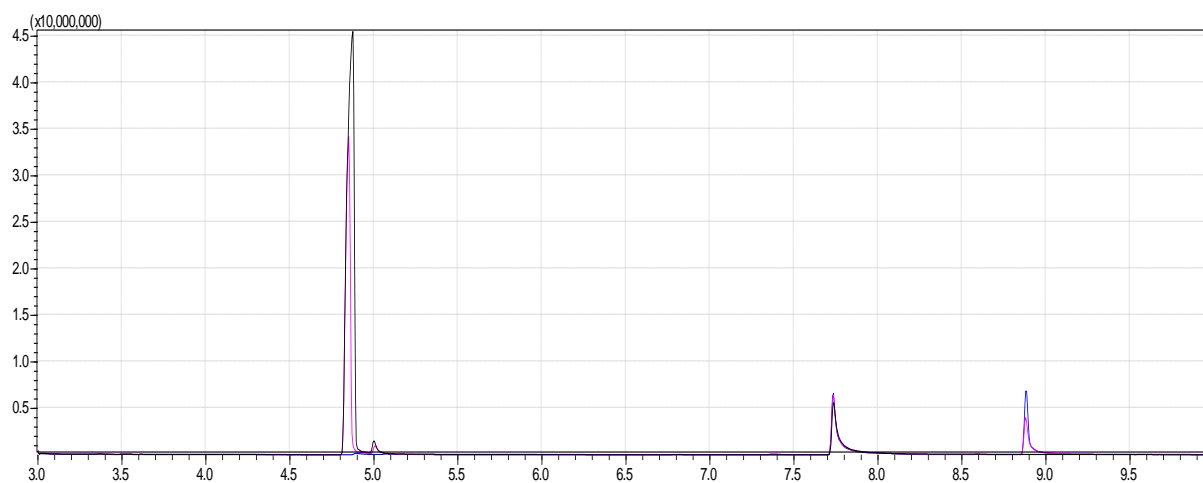

**Fig. S5** GC-MS result of the conversion of cyclohexanol to  $\epsilon$ -caprolactone after 24 hours (Table 3, first row). Black = control, pink = TbADH with TmCHMO separately, blue = TbADH-TmCHMO fusion. The first peak, with a retention time of 4.8 minutes, corresponds to cyclohexanol. The second peak (5.0) is cyclohexanone. The external standard (acetophenone) has a peak at 7.7 min. The last peak, at 8.9 minutes, corresponds to  $\epsilon$ -caprolactone.

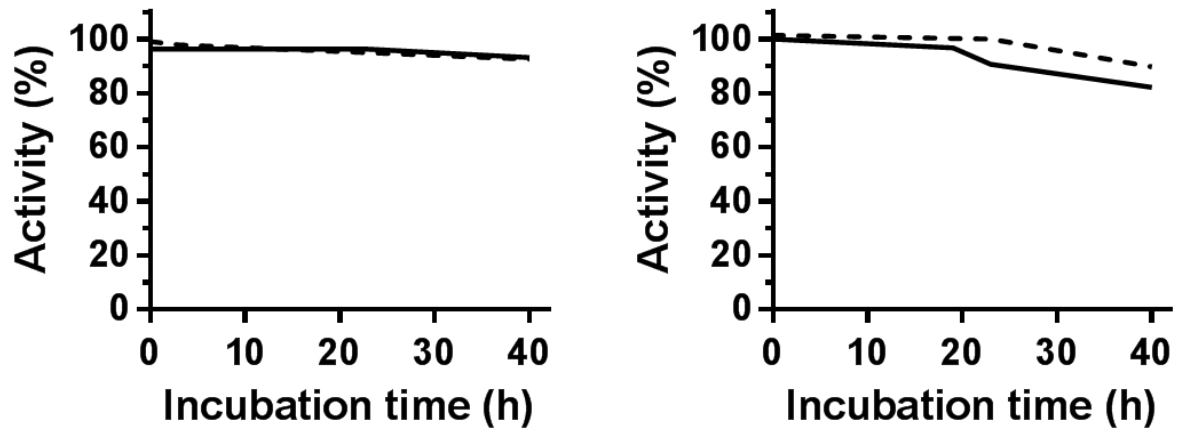

**Fig. S6** Stability of ADH activity (left) and CHMO activity (right) over time at 37 °C, 0.5 M KPi pH 8.0. The dashed lines represent the activity of the Tb-Tm fusion, the bold line the activity of the separate TbADH (left) or TmCHMO (right).
